# Supplementary material
Source: PubMed Central journal article supplement (PMC3529033)
Supplement: 1218925110_pnas.201218925SI.pdf [file 1218925110_pnas.201218925SI.pdf]

# Supporting Information

Yasui et al. 10.1073/pnas.1218925110

## SI Materials and Methods

**Mice.** C57BL/6 mice were purchased from CLEA Japan and  $\mu$ MT mice were obtained from The Jackson Laboratory. GFP transgenic mice were provided by M. Okabe, (Osaka University, Osaka). To generate *Pkn1*<sup>-/-</sup> mice, a targeting vector that disrupts the *Pkn1* gene was introduced into E14 (129) ES cells. The mutant ES cells were microinjected into C57BL/6 mice and heterozygous offspring were intercrossed to produce homozygous mutant animals. The *Pkn1*<sup>-/-</sup> mice were backcrossed to C57BL/6 mice for 15 generations. All mice were maintained in a specific pathogen-free animal facility in accordance with the Osaka University Guidelines for Animal Experimentation; this study was approved by the institutional animal care and use committee (permission number: H21-28-0).

**Antibodies.** The following antibodies were used for FACS analyses and immunohistochemistry: anti-CD19-APC-Cy7, anti-B220 (PE-Cy7 or PE conjugated), anti-Fas (CD95)-FITC, anti-GL7-FITC, anti-CD90.2-FITC, anti-CD4-PE-Cy7, anti-CD8-APC-Cy7, anti-Gr-1-FITC, anti-CD11b-FITC, anti-IgM-FITC, streptavidin (PE or APC-Cy7 conjugated) (all obtained from BD Biosciences), anti-PNA biotinylated (Vector Laboratories), anti-IgG1-APC, goat antimouse IgG, anti-goat-FITC (all obtained from Jackson ImmunoResearch), anticomplement C3-FITC (MP Biomedicals), and anti-IgD-FITC (Nordic Immunology). Anti-NP-PE was prepared by conjugating the NP-coupled imide-ester with PE (1).

The following antibodies were used for Western blot or immunoprecipitation analyses: antiphospho-Akt, anti-Akt, antiphospho-FoxO4, anti-FoxO4, anti-Bcl-xL, anti-FoxO1, anti- $\alpha$ -tubulin (all obtained from Cell Signaling Technology), as well as anti-FLAG and anti-HA (both obtained from Sigma), and anti-PKN1 (obtained from BD Biosciences).

**Plasmids.** To construct FLAG-PKN1FL, FLAG-PKN1CA, pMSCV-PKN1CA, and pMSCV-PKN1KD, the corresponding cDNA fragments were cloned into pCMVFLAG7.1 (Sigma) or pMSCVpuro (Clontech). To construct HA-Akt1, the corresponding cDNA fragment was cloned into pcDNA3HA (Invitrogen). MyrAkt1 was generated by fusing the c-Src myristoylation sequence to the N terminus of Akt1. To generate pMIGRI-MyrAkt1, MyrAkt1 was inserted into the pMIGRI retroviral vector, which was provided by W. Pear (University of Pennsylvania, Philadelphia).

**Cell Culture and Reagents.** Mature B cells were purified from splenocytes with Mouse B Lymphocyte Enrichment Set-DM (BD Bioscience) or a Magnetic cell sorting (MACS)-based B-cell isolation kit (Miltenyi Biotec) according to the manufacturer's protocol. Ramos cells, a human Burkitt's lymphoma cell line, were cultured in RPMI1640 medium containing 10% (vol/vol) FBS, 100  $\mu$ g/ml streptomycin/100 units/ml penicillin, and 50  $\mu$ M 2-mercaptoethanol. 293T, 3Y1, and Plat E cells were maintained in Dulbecco's modified Eagle medium containing 10% (vol/vol) FBS at 37 °C in 5% CO<sub>2</sub>.

**Transfection and Retrovirus Production.** 293T cells were transfected with each plasmid using FuGENE 6 transfection reagent (Roche). Ecotropic retroviruses were generated by cotransfecting pMIGRI, pMIGRI-MyrAkt1, pMSCVpuro, pMSCVpuro-PKN1CA, or pMSCVpuro-PKN1KD into PlatE cells using FuGENE 6 (Roche).

**ELISA.** Anti-dsDNA antibody production was measured by ELISA according to the manufacturer's protocol (Shibayagi). To detect IL-6 production, purified B cells ( $1 \times 10^6$ ) were cultured with 10  $\mu$ g/mL of an anti-IgM antibody (Jackson ImmunoResearch) and 10  $\mu$ g/mL of an anti-CD40 antibody (BD Biosciences). The cultured supernatants were harvested at the indicated times and IL-6 was detected using an IL-6-specific ELISA kit (R&D Systems). Serum Ig production was measured by ELISA with antibodies specific for each Ig isotype as previously described (2).

**Proliferation Assay.** Purified B cells ( $5 \times 10^4$ ) were cultured in triplicate in a flat-bottomed 96-well plate with 10  $\mu$ g/mL anti-IgM F(ab')<sub>2</sub> (Jackson ImmunoResearch), 10  $\mu$ g/mL anti-CD40 antibody, 20 ng/mL BAFF (R&D Systems), 20 ng/mL IL-4, and 10  $\mu$ g/mL LPS. The cultures were incubated for 72 h and pulsed for 12 h before the culture was terminated.

**Cell Survival Assay.** B cells purified from either control or *Pkn1*<sup>-/-</sup> mice were incubated for the indicated time periods in a 24-well plate coated with 100  $\mu$ g/mL of immobilized anti-IgM F(ab')<sub>2</sub> fragment (Southern Biotechnology). The cells were stained with Annexin V-FITC and propidium iodide according to the manufacturer's protocol (BioVision) and viable cells were determined by flow cytometry.

**BrdU Incorporation Assay.** To detect BrdU incorporation, purified B cells ( $5 \times 10^5$ ) were cultured in either the presence or absence of 10  $\mu$ g/mL of anti-IgM F(ab')<sub>2</sub> fragment with 10  $\mu$ M BrdU. After a 48-h incubation, the BrdU incorporation assay was performed according to the manufacturer's protocol (BD Biosciences).

**Flow Cytometric Analyses and Single Cell Sorting.** Flow cytometric analyses were performed using a FACSCalibur and Cell Quest software (BD Biosciences) or a FACSCanto II and FACS Diva software (BD Biosciences). To sequence *V<sub>H</sub>186.2-DFL16.1* DNA, cells were stained with fluorescently labeled antibodies against CD3, CD90.2, CD4, CD8, CD11b, and Gr-1, (lineage) together with labeled anti-IgM, IgD, IgG1, and NP-conjugated PE. Lineage<sup>-</sup>IgM<sup>-</sup>IgD<sup>-</sup>NP-binding<sup>+</sup> IgG<sup>+</sup> B cells were obtained by single cell sorting using a FACSaria II (BD Biosciences).

**Colony Transforming Assay.** A colony transforming assay was performed as previously described (3). Briefly, to examine growth in soft agar, 35-mm dishes were prepared with a lower layer of 0.7% agar solution in DMEM with 10% (vol/vol) FBS containing 1  $\mu$ g/mL of puromycin and then overlaid with a 0.35% agar solution also containing 10% (vol/vol) FBS and a supplement containing  $1 \times 10^5$  retrovirally transduced cells. Twenty-one days after plating, colonies larger than 0.1 mm in diameter were counted.

**Akt Kinase Assay.** Akt activity was measured using an Akt enzyme activity kit (Millipore). Briefly, 293T cells were lysed and the supernatants were immunoprecipitated with a mouse anti-Akt antibody. Protein-G sepharose-bound immune complexes were resuspended in a buffer containing the GSK substrate peptide (RPRAATF) and  $\gamma$ -[<sup>32</sup>P]ATP (GE Healthcare). Radioactivity was analyzed using a liquid scintillation counter.

**Sequence Analysis of the *V<sub>H</sub>186.2-DFL16.1* Gene.** To extract total RNA from each cell, an isolated single cell was lysed in cell lysis buffer [first strand buffer (Invitrogen), RNase inhibitor (WAKO), 0.2 mM dNTPs, 0.25% (vol/vol) Nonidet P-40, 0.1 mg/mL BSA,



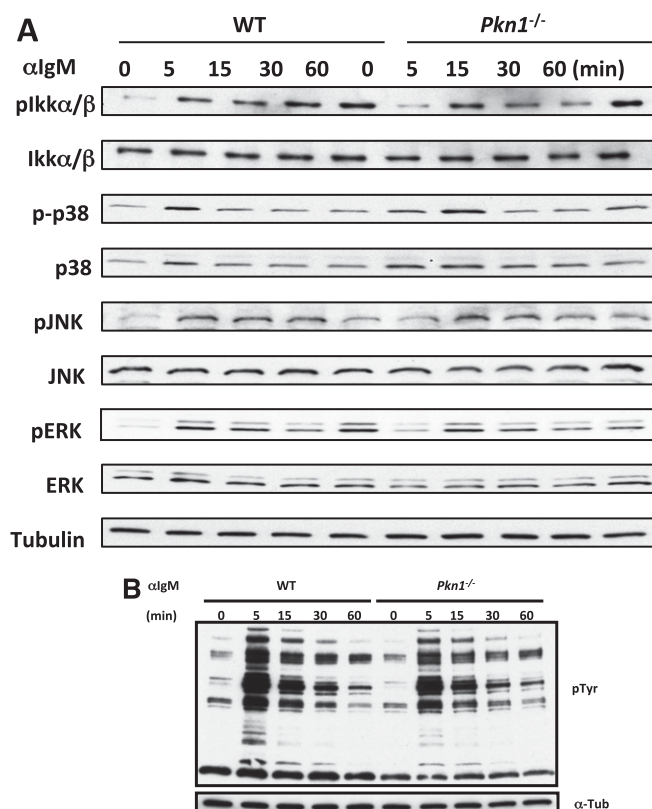

**Fig. S4.** Activation of signaling molecules downstream of the BCR. B cells ( $5 \times 10^4$ ) were stimulated with 10  $\mu\text{g}/\text{mL}$  of an anti-IgM F(ab)<sub>2</sub> for the indicated time periods. (A) Cell lysates were prepared and subjected to Western blot analysis to detect phosphorylated IKK $\alpha$ /b, p38, JNK, and ERK. (B) Tyrosine phosphorylation induced by BCR ligation was detected using an antiphospho-tyrosine antibody (4G10; Millipore).



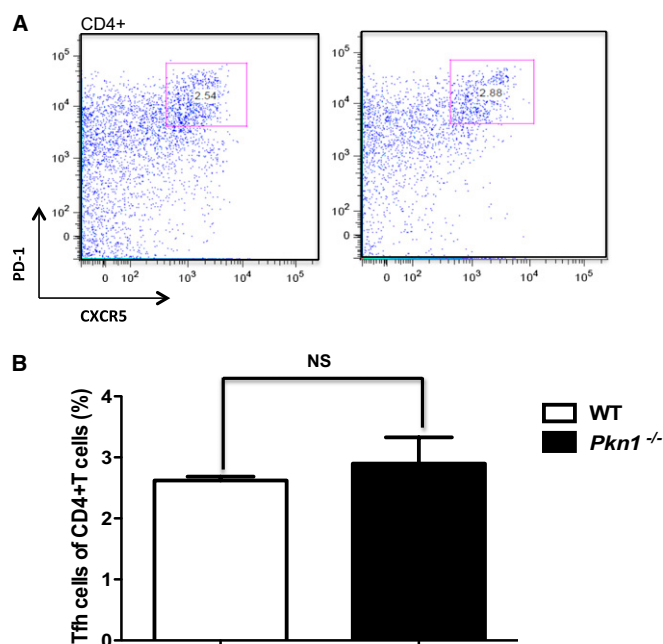

**Fig. S7.** Normal differentiation of follicular helper T (T<sub>fh</sub>) cells in *Pkn1*<sup>-/-</sup> mice. WT and *Pkn1*<sup>-/-</sup> mice were intraperitoneally immunized with sheep red blood cells. After 7 d, splenocytes were stained with anti-CD4, anti-PD-1, and anti-CXCR5 antibodies and analyzed by flow cytometry. (A) Representative data are shown for T<sub>fh</sub> cells, which were identified based on PD-1<sup>+</sup>CXCR5<sup>+</sup> expression after gating on total CD4<sup>+</sup> T cells. (B) Statistical analysis of the population of T<sub>fh</sub> cells for at least three mice per group. NS, not significant.

**Table S1. Somatic genetics at the Ig locus of NP-binding GC B cells**

| R/S ratio                 | WT ( <i>n</i> = 56) | <i>Pkn1</i> <sup>-/-</sup> ( <i>n</i> = 59) |
|---------------------------|---------------------|---------------------------------------------|
| CDR1*                     | 13.5                | 11.0                                        |
| CDR2                      | 5.8                 | 2.5                                         |
| CDR1+CDR2                 | 8.0                 | 4.3                                         |
| Framework                 | 2.2                 | 2.0                                         |
| DFL16.1, % <sup>†</sup>   | 93.0                | 80.0                                        |
| YYGS, % <sup>‡</sup>      | 23.0                | 25.0                                        |
| W to L 33, % <sup>§</sup> | 60.7                | 37.3                                        |

\*Value of R/S ratio in  $V_H186.2$  gene.

<sup>†</sup>Percentage of rearranged DFL16.1 gene segment coupled to *V<sub>H</sub>186.2* gene.

\*Percentage of rearranged YYGS in CDR3 coupled to rearranged  $V_H186.2$  gene.

<sup>5</sup>The percentage of rearranged *VH186.2* gene carrying W to L mutation at position 33.
